# Supplementary material for: Wahana wisata bahari di Banyuwangi
Source: MDPI journal article supplement (doi:10.3390/vaccines11081376), 2008-01-01
Supplement: s1 [file s1]

**Supplementary Table S1.** Median and IQR of anti-SARS-CoV-2 Spike, anti-SARS-CoV-2 RBD, and neutralizing antibody fold rise on days 28, 60, 90, and 180 in healthy people.

|                                                              | Day 28        |      | Day 60       |      | Day 90       |      | Day 180      |      |
|--------------------------------------------------------------|---------------|------|--------------|------|--------------|------|--------------|------|
|                                                              | Median (IQR)  | P    | Median (IQR) | P    | Median (IQR) | P    | Median (IQR) | P    |
| Anti-SARS-CoV-2 Spike antibody median fold rise (IQR)        |               |      |              |      |              |      |              |      |
| Age                                                          |               |      |              |      |              |      |              |      |
| ≤ 40                                                         | 1.84 (1.62)   | 0.28 | 1.03 (3.12)  | 0.17 | 0.80 (2.06)  | 0.12 | 0.64 (2.41)  | 0.04 |
| > 40                                                         | 4.08 (24.58)  |      | 4.75 (16.27) |      | 1.39 (9.66)  |      | 3.14 (10.32) |      |
| Gender                                                       |               |      |              |      |              |      |              |      |
| Female                                                       | 2.19 (3.62)   | 0.9  | 1.58 (6.88)  | 0.99 | 0.88 (2.44)  | 0.69 | 1.22 (3.95)  | 0.77 |
| Male                                                         | 3.07 (26.53)  |      | 2.11 (26.61) |      | 1.27 (12.17) |      | 2.11 (15.05) |      |
| COVID-19 History                                             |               |      |              |      |              |      |              |      |
| No                                                           | 2.04 (12.24)  | 0.2  | 1.75 (10.06) | 0.4  | 1.24 (7.58)  | 0.37 | 1.24 (8.90)  | 0.98 |
| Yes                                                          | 3.12 (70.67)  |      | 7.70 (14.05) |      | 0.81 (2.23)  |      | 2.14 (2.93)  |      |
| Booster                                                      |               |      |              |      |              |      |              |      |
| BP                                                           | 2.55 (20.21)  | 0.39 | 3.34 (26.99) | 0.17 | 3.50 (8.80)  | 0.11 | 4.08 (8.42)  | 0.26 |
| BPa                                                          | 2.71 (31.53)  |      | 1.53 (11.34) |      | 0.74 (1.61)  |      | 1.15 (2.43)  |      |
| BB                                                           | 2.28 (4.78)   |      | 2.11 (7.26)  |      | 1.22 (5.35)  |      | 2.76 (8.69)  |      |
| Anti-SARS-CoV-2 Neutralizing antibody median fold rise (IQR) |               |      |              |      |              |      |              |      |
| Age                                                          |               |      |              |      |              |      |              |      |
| ≤ 40                                                         | 1.01 (0.05)   | 0.09 | 1.05 (0.06)  | 0.10 | 1.02 (0.20)  | 0.18 | 1.01 (0.16)  | 0.11 |
| > 40                                                         | 1.15 (1.22)   |      | 1.2 (1.07)   |      | 1.19 (1.51)  |      | 1.43 (2.05)  |      |
| Gender                                                       |               |      |              |      |              |      |              |      |
| Female                                                       | 1.04 (0.13)   | 0.39 | 1.05 (0.16)  | 0.76 | 1.04 (0.27)  | 0.57 | 1.04 (0.22)  | 0.68 |
| Male                                                         | 1.77 (2.00)   |      | 1.39 (2.00)  |      | 1.13 (2.07)  |      | 1.8 (2.20)   |      |
| COVID-19 History                                             |               |      |              |      |              |      |              |      |
| No                                                           | 1.08 (1.01)   | 0.07 | 1.09 (0.86)  | 0.06 | 1.07 (1.09)  | 0.48 | 1.05 (1.07)  | 0.90 |
| Yes                                                          | 1.01 (0.74)   |      | 1.05 (0.96)  |      | 1.03 (1.55)  |      | 1.01 (1.89)  |      |
| Booster                                                      |               |      |              |      |              |      |              |      |
| BP                                                           | 1.49 (5.38)   | 0.06 | 1.51 (5.11)  | 0.04 | 1.56 (5.29)  | 0.11 | 1.44 (5.81)  | 0.32 |
| BPa                                                          | 1.05 (0.51)   |      | 1.06 (0.71)  |      | 1.00 (0.82)  |      | 1.02 (0.71)  |      |
| BB                                                           | 1.04 (0.46)   |      | 1.02 (0.40)  |      | 1.12 (0.84)  |      | 1.14 (1.48)  |      |
| Anti-SARS-CoV-2 RBD antibody median fold rise (IQR)          |               |      |              |      |              |      |              |      |
| Age                                                          |               |      |              |      |              |      |              |      |
| ≤ 40                                                         | 1.84 (2.62)   | 0.52 | 0.51(4.95)   | 0.19 | 0.40 (1.90)  | 0.17 | 0.46 (4.07)  | 0.11 |
| > 40                                                         | 2.69 (13.33)  |      | 2.69 (13.33) |      | 1.56 (8.47)  |      | 1.09 (6.41)  |      |
| Gender                                                       |               |      |              |      |              |      |              |      |
| Female                                                       | 1.88 (5.10)   | 0.16 | 2.12 (5.48)  | 0.66 | 0.85 (45.30) | 0.88 | 1.04 (0.22)  | 0.89 |
| Male                                                         | 3.46 (136.07) |      | 1.35 (22.53) |      | 0.80 (13.79) |      | 1.84 (2.20)  |      |
| COVID-19 History                                             |               |      |              |      |              |      |              |      |
| No                                                           | 2.82 (20.89)  | 0.02 | 2.12 (8.96)  | 0.01 | 1.56 (8.69)  | 0.02 | 0.89 (5.14)  | 0.13 |
| Yes                                                          | 1.17 (0.91)   |      | 0.47 (2.49)  |      | 0.19 (0.44)  |      | 0.31 (0.81)  |      |
| Booster                                                      |               |      |              |      |              |      |              |      |
| BP                                                           | 6.81 (155.93) | 0.02 | 5.64 (25.34) | 0.07 | 5.20 (8.31)  | 0.10 | 2.17 (6.09)  | 0.16 |

|     |              |             |             |              |
|-----|--------------|-------------|-------------|--------------|
| BPa | 2.02 (11.16) | 1.66 (5.60) | 0.85 (3.67) | 0.52 (1.09)  |
| BB  | 1.49 (4.67)  | 0.61 (5.51) | 0.51 (4.43) | 0.80 (24.65) |

---

HC: healthy control. BP: BBIBP-CorV /PastoCovac-Plus, BPa: BBIBP-CorV /PastoCovac, BB: BBIBP-CorV /BBIBP-CorV .  
 Bold P values are shown as significant.
